# Supplementary material
Source: publisher site journal article supplement (https://zookeys.pensoft.net/article/6221/download/suppl/34/)

# Heterozigosity per locus

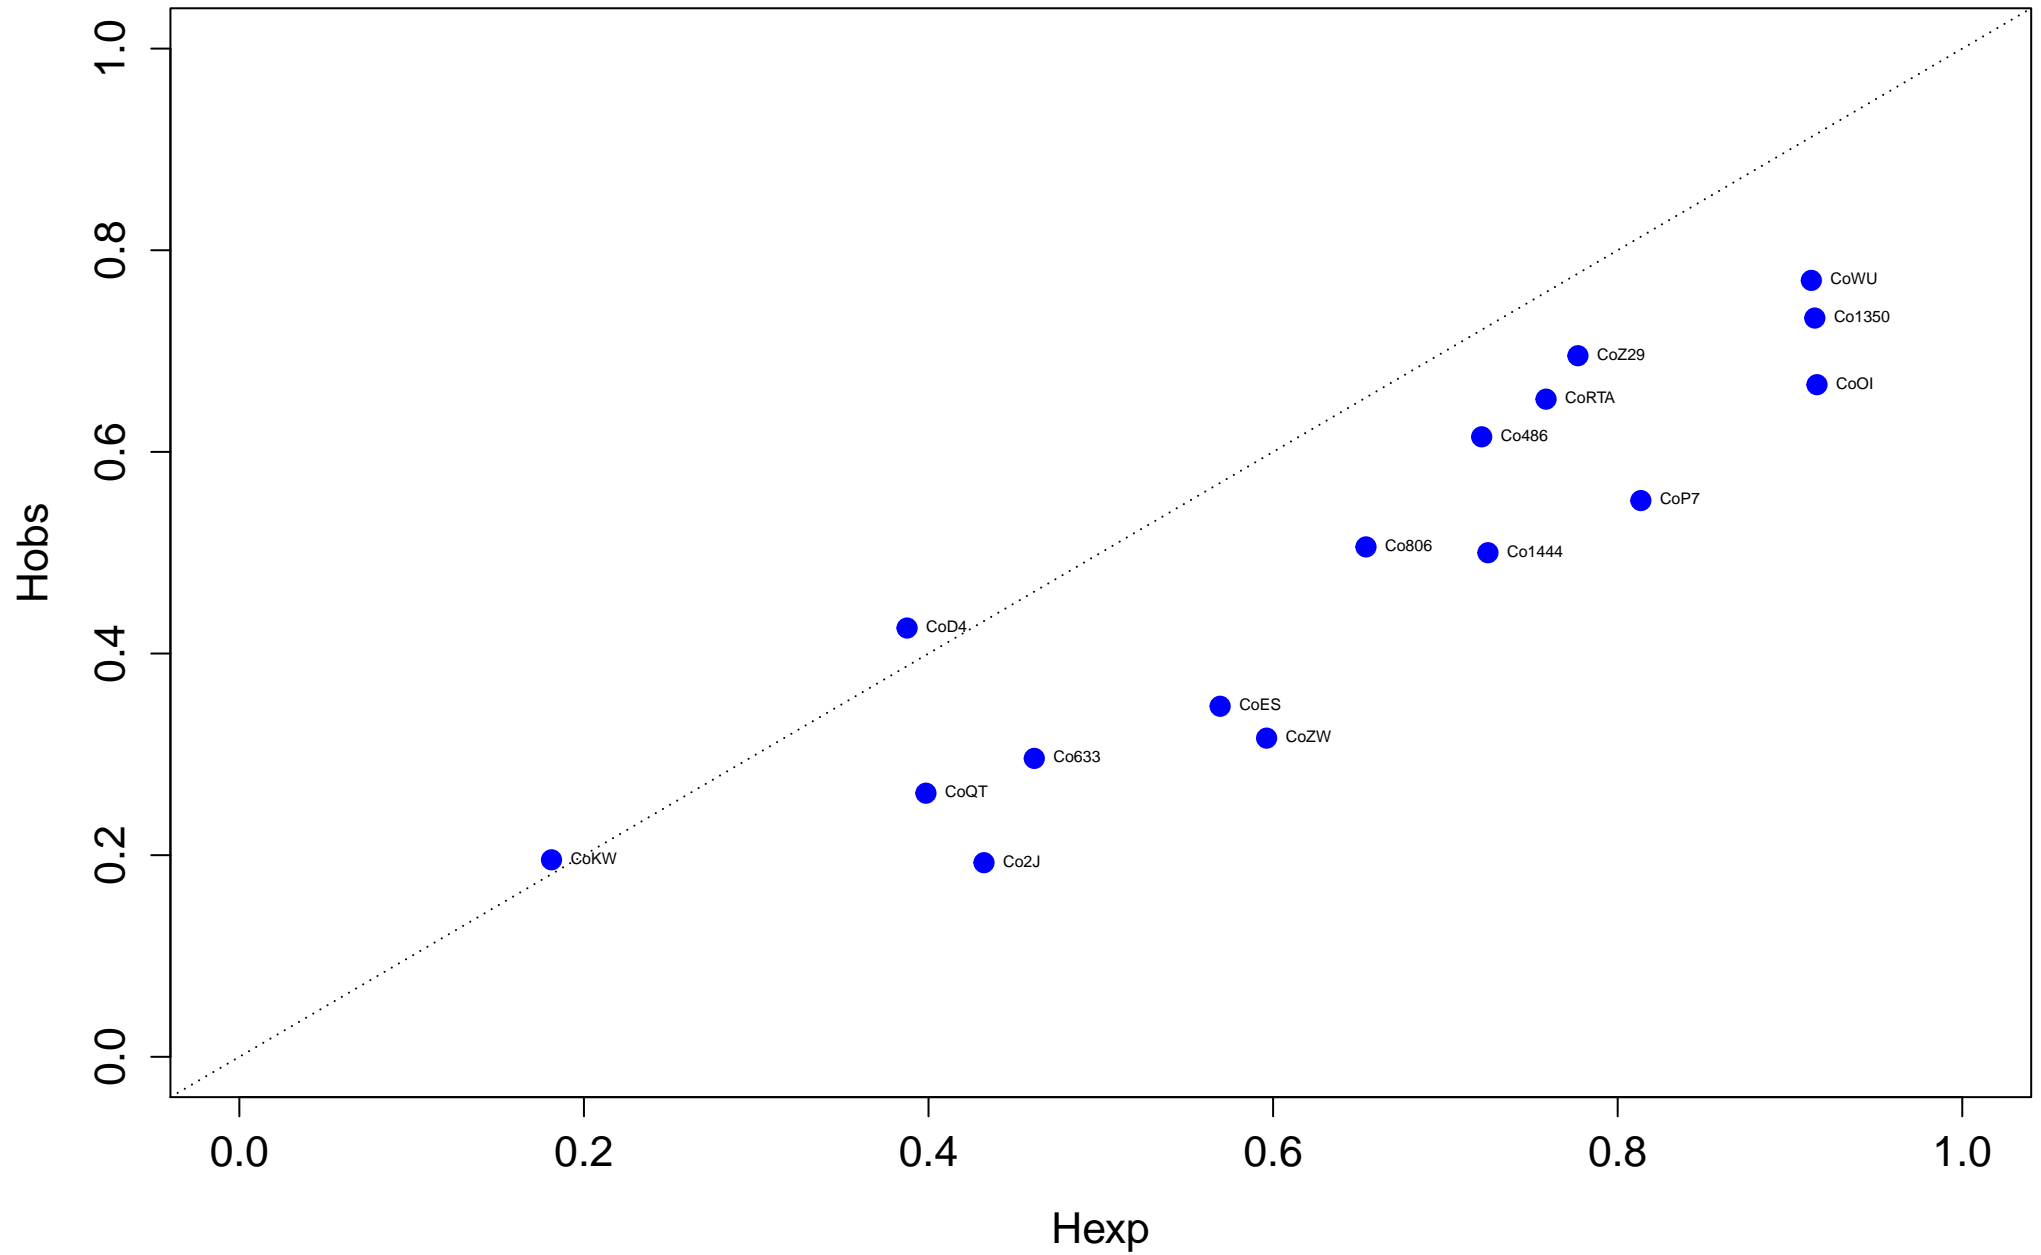

Supplement: Supplementary file
